# Supplementary figures and images for: Caged-Sphere Optofluidic Sensors: Whispering Gallery Resonators in Wicking Microfluidics
Source: MDPI journal article supplement (doi:10.3390/s22114135), 2022-05-29

## Supplementary Information

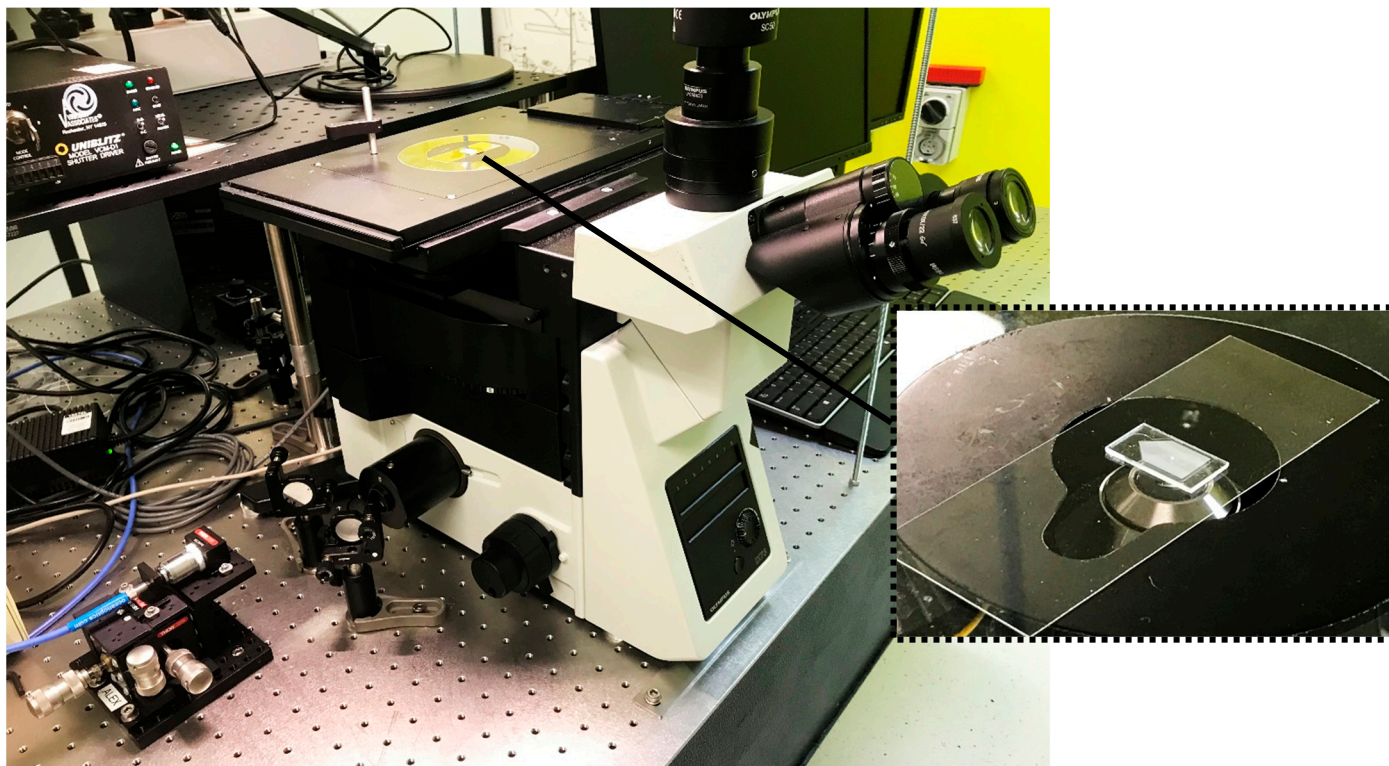

**Figure S1.** Photo of experimental setup.

Supplement: s1 [file s1]
